# Supplementary material
Source: PubMed Central journal article supplement (PMC7854861)
Supplement: NIHMS1621894-supplement-1.pdf [file NIHMS1621894-supplement-1.pdf]

**Supplemental Table 1: Geriatric assessment domains, tools, and definitions of impairment (impairment is considered present within each domain if there is one impairment noted on at least one tool)**

| <b>Domains</b>       | <b>Tools</b>                       | <b>Descriptions</b>                                                                                                                                                                                                               | <b>Definitions of impairment</b>                     |
|----------------------|------------------------------------|-----------------------------------------------------------------------------------------------------------------------------------------------------------------------------------------------------------------------------------|------------------------------------------------------|
| Physical performance | Timed "Up and Go"                  | Assess mobility over 3 meters; longer time indicates worse performance                                                                                                                                                            | >13.5 seconds                                        |
|                      | Short Physical Performance Battery | Assess balance, gait speed, and strength; higher score indicates better performance (range 0-12 points)                                                                                                                           | ≤ 9 points                                           |
|                      | Falls History                      | Assess the number of falls                                                                                                                                                                                                        | Any history of falls in the prior 6 months           |
|                      | OARS Physical Health               | Assess any limitation in 12 activities (e.g. climbing several flight of stairs, walking more than a mile) as a result of his/her health (options: a lot, a little, not at all)                                                    | If the patient answered any question as "a lot"      |
| Functional status    | Activities of Daily Living (ADL)   | Assess difficulty with the following 6 activities: bathing, dressing, eating, getting in and out of bed/chairs, walking, toileting (options: yes/no)                                                                              | Any deficit (yes)                                    |
|                      | Instrumental ADLs                  | Assess independence in the following 7 activities: using the telephone, transportation, shopping, preparing meals, doing housework, taking medicine, managing money (options: without help, with some help, completely unable to) | Any deficit (with some help or completely unable to) |
| Comorbidity          | OARS Comorbidity                   | Assess the presence of 13 illnesses (e.g. other cancer or leukemia, arthritis, glaucoma) as                                                                                                                                       | Patient answered "yes" to 3 illnesses OR             |

|                |                                                     |                                                                                                                                                                                                                                                                                                                                                                                    |                                                                                                |
|----------------|-----------------------------------------------------|------------------------------------------------------------------------------------------------------------------------------------------------------------------------------------------------------------------------------------------------------------------------------------------------------------------------------------------------------------------------------------|------------------------------------------------------------------------------------------------|
|                |                                                     | well as hearing and visual impairments, and how much each problem interferes with his/her activities (options: not at all, somewhat, a great deal)                                                                                                                                                                                                                                 | answered that 1 illness interferes "a great deal" (including eyesight and hearing)             |
| Cognition      | BLESSED<br>Orientation-<br>Memory-<br>Concentration | Assess orientation, memory, and concentration using 6 items and scores are weighted; higher score indicates worse performance (range 0-28 points)                                                                                                                                                                                                                                  | $\geq 11$ points                                                                               |
|                | Mini Cog                                            | Assess word recall and clock drawing based on 3 items; lower score indicates worse performance (range 0-5 points)                                                                                                                                                                                                                                                                  | 0 words recalled OR 1-2 recalled words + abnormal clock drawing test (or $<3$ points)          |
| Nutrition      | Body Mass Index                                     | Divide weight in kilograms by height in meters squared                                                                                                                                                                                                                                                                                                                             | $< 21$ kg/m                                                                                    |
|                | Weight loss                                         | Assess change in weight over 6 months                                                                                                                                                                                                                                                                                                                                              | $> 10\%$ change in weight from 6 months ago                                                    |
|                | Mini Nutrition Assessment                           | Assess nutritional status using 6 items; lower score is worse (range 0-14 points)                                                                                                                                                                                                                                                                                                  | $\leq 11$ points                                                                               |
| Social Support | OARS Medical Social Support                         | Assess the presence of social support using 4 items ("someone to help if you were confined to bed, someone to take you to the doctor if needed, someone to prepare your meals if you were unable to do it yourself, someone to help you with daily chores if you were sick." Options: none of the time, a little of the time, some of the time, most of the time, all of the time) | Patient answers any one of questions as "some of the time, a little of time, none of the time" |

|                      |                                |                                                                                                            |                                                                                            |
|----------------------|--------------------------------|------------------------------------------------------------------------------------------------------------|--------------------------------------------------------------------------------------------|
| Polypharmacy         | Medications                    | Assess the number of regularly scheduled medications, presence of high risk medication, or kidney function | 5 regularly scheduled medications (OR Any high risk medication OR creatinine clearance<60) |
| Psychological health | Geriatric Depression Scale     | Assess depression using 15 items; higher score is worse (range 0-15 points)                                | $\geq 5$ points                                                                            |
|                      | Generalized Anxiety Disorder-7 | Assess anxiety using 7 items; higher score is worse (range 0-21 points)                                    | $\geq 10$ points                                                                           |

Abbreviations: ADL, Activity of Daily Living; OARS, Older American Resources and Services
